# Supplementary material for: Heterologous Expression of the Melatonin-Related Gene HIOMT Improves Salt Tolerance in Malus domestica
Source: MDPI journal article supplement (doi:10.3390/ijms222212425), 2021-11-17
Supplement: s1 [file s1]

**Table S1** Primers used in this study.

| Name            | Sequence (5'-3')            |
|-----------------|-----------------------------|
| <i>EF</i>       | F: ATTCAAGTATGCCTGGGTGC     |
|                 | R: CAGTCAGCCTGTGATGTTCC     |
| <i>MdTDC</i>    | F: TCACGCTGTGGTTGGAGGT      |
|                 | R: CTGCATGCTCCTGAACCAAC     |
| <i>MdT5H4</i>   | F: TCGGTGACATGTTTGCTGC      |
|                 | R: GGAAACCTTGGTCTGGCG       |
| <i>MdAANAT2</i> | F: GAATCACCGTCCACGCTCC      |
|                 | R: GAAATGCTTCCGATGTCCC      |
| <i>MdASMT1</i>  | F: AGAGGAGCGAGAAAGACTGGA    |
|                 | R: CTAAAGAAAACTTCAATGAGGGAT |
| <i>MdSOS1</i>   | F: TCCGGTTAATCCATCACACACCGT |
|                 | R: TTTGCTGCCCTGGAGGATTTGTTG |
| <i>MdSOS2</i>   | F: CAAAAGCACCATTCTCAAGCAC   |
|                 | R: CCGACCAGCCAAAACCTCT      |
| <i>MdSOS3</i>   | F: AAGGCAAGGCGGCAGTTT       |
|                 | R: GCGAGGCATTGGGATGAA       |
| <i>MdNHX1</i>   | F: AAGCGACAGTCCTGGAACATCAGT |
|                 | R: TATTATCACTTGCTGCCGGAGGCT |
| <i>MdNHX2</i>   | F: ATGCGTGGCTCTGTTTCAAT     |
|                 | R: AACTGTGATGGTGCTGGTGA     |
| <i>MdNHX4</i>   | F: ATCACCAAAACCACCAACCA     |
|                 | R: GCCCACTTCTTAGGCAACG      |
| <i>MdAKT1</i>   | F: GCGGAGACGAAAAGTCCTAA     |
|                 | R: AGTGGGAGCAGCACAAGTTT     |
